# Supplementary material for: Improved siRNA/shRNA Functionality by Mismatched Duplex
Source: PLoS One. 2011 Dec 9;6(12):e28580. doi: 10.1371/journal.pone.0028580 (PMC3235145; doi:10.1371/journal.pone.0028580)
Supplement: Table S3 — shRNA sequences. Mature duplex sequences are marked in bold. Small cap represents the mismatched nucleotides. (XLS) [file pone.0028580.s005.xls]

## Sheet: Sheet1
Table S3. shRNA sequences
shR-HIV 5' UTR m0
CAGCGGCGGCTCCTCTCCCCATGGCCCTGAAGGCAAGCTTTATTGAGGCTTCTGGGCTCAGACCGCCTCAATAAAGCTTGCCTTCAGGGACCTGGGGACCCCGGCACCGGCAGGCCCCA
shR-HIV 5' UTR m1+4+10
CAGCGGCGGCTCCTCTCCCCATGGCCCTGAAGGCAAGCTTTATTGAGGCTTCTGGGCTCAGACCGCCTCAATAAcGCTTGgCTaCAGGGACCTGGGGACCCCGGCACCGGCAGGCCCCA
shR-21 m0
CAGCGGCGGCTCCTCTCCCCATGGCCCTGGACTCTCCAATGTCACAGAGCACTGGGCTCAGACCCTCTGTGACATTGGAGAGTCCAGGGACCTGGGGACCCCGGCACCGGCAGGCCCCA
shR-21 m1+4+10
CAGCGGCGGCTCCTCTCCCCATGGCCCTGGACTCTCCAATGTCACAGAGCACTGGGCTCAGACCCTCTGTGACAaTGGAGcGTgCAGGGACCTGGGGACCCCGGCACCGGCAGGCCCCA
Mature duplex sequences are marked in bold. Small cap represents the mismatched nucleotides.
